# Supplementary material for: High-sensitivity detection of H2S by In2O3/C composite prepared by inert-ambient sealed-tube pyrolysis
Source: Springer Nature journal article supplement (doi:10.1007/s42452-019-0760-5), 2019-06-13
Supplement: MOESM1 [file 42452_2019_760_MOESM1_ESM.doc]

**Supporting Information**

**High-sensitivity detection of H2S by In2O3/C composite prepared by inert-ambient sealed-tube pyrolysis**

M. Srinidhi Raghavan1,2 and S.A. Shivashankar 1

1 Centre for Nano Science and Engineering, Indian Institute of Science, Bengaluru-560012, India

2 Department of Chemistry, BMS College of Engineering, Bengaluru-560004

*E-mail: [rsrinidhi@iisc.ac.in](mailto:rsrinidhi@iisc.ac.in)

1. **Supporting Information Fig.S1**

Figure.S1 is a schematic representation of the molecular structure of Indium acetylacetonate, In(acac)3, used as the precursor material in the STP process, with M=In


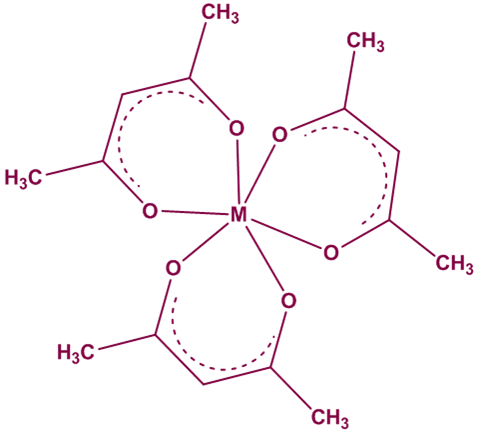


***Fig.S1 Molecular structure of indium acetylacetonate***

1. **Supporting Information Fig.S2**

The FTIR spectrum of the complex In(acac)3, embedded in KBR pellet, was recorded in the range of 400 – 4000 cm-1. The complex clearly displays the presence of bands in the chelate carbonyl and M-O regions, indicating the formation of the MO (metal-organic) complex, in this case the acetylaetonate of indium. Peaks corresponding to In(acac)3 are observed at 455 cm-1 and at 570, 774, 802, 1020 cm-1. By comparing the spectrum with one in the literature, the formation of indium acetylacetonate is confirmed.

Ref. www.sigmaaldrich.com/spectra/ftir/FTIR008202.PDF


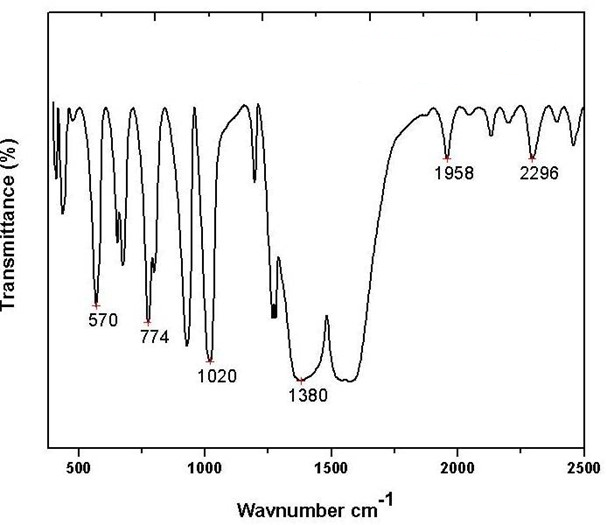


***Fig.S2 FTIR Spectrum of In(acac)3***

1. **Supporting Information Fig. S3:**

**Electrical characterization of the In2O3/C pellet.**

Figure S3 shows the variation of electrical resistance of the In2O3/C pellet with temperature, in the range of 50–200°C. The data show that the material is semiconducting.

***
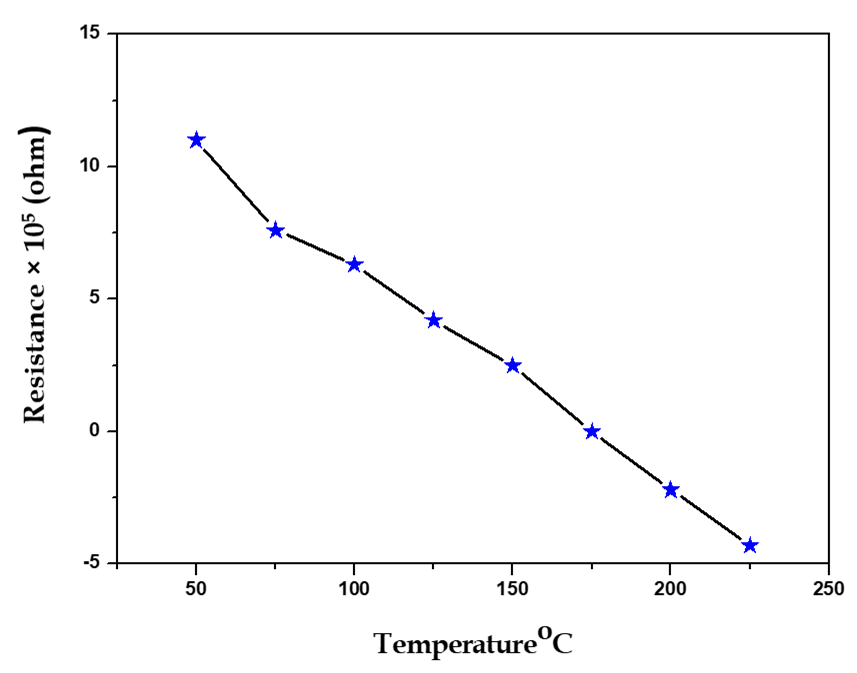
***

***Fig S3*** Resistance vs. temperature characteristics of In2O3/C

1. **Supporting Information Fig. S4:**

Linear regression equations, regression coefficients and relative standard deviations for Figure 7(B), Figure 8(B) and Figure 9. S = standard deviation.


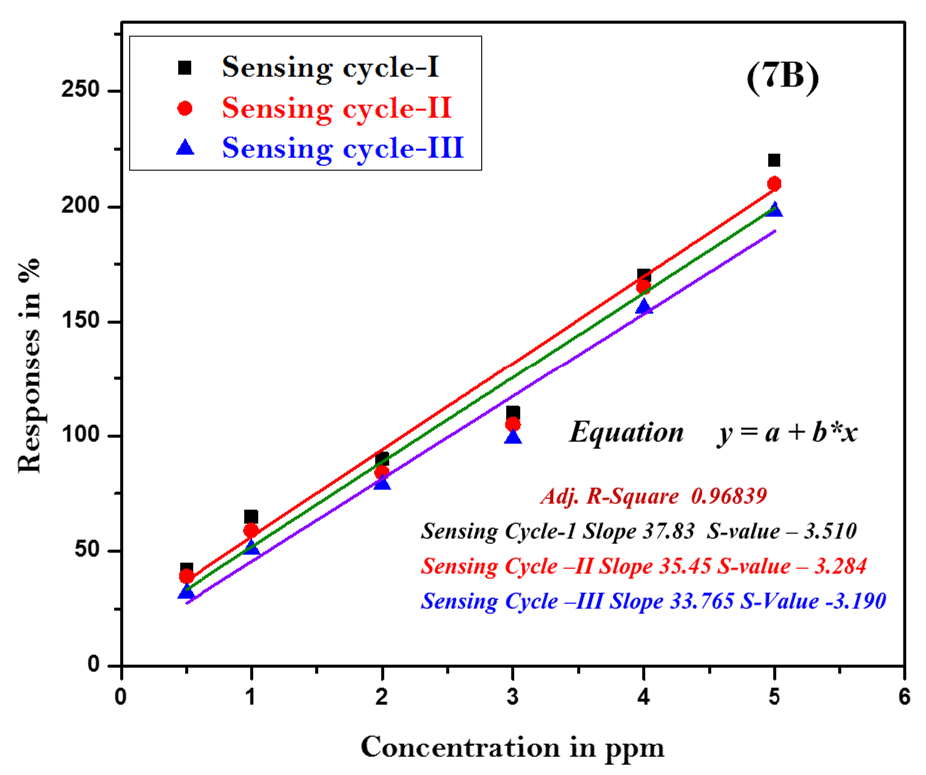


***Fig.7B*** Sensing cycle of In2O3/C at operating temperature 250oC.


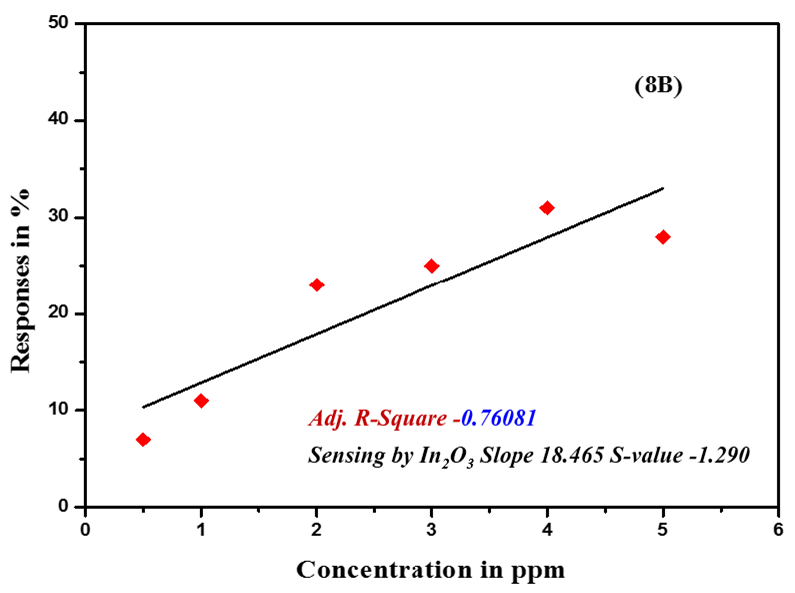


***Fig.8B*** Sensing Cycle of In2O3 at operating temperature 250oC.


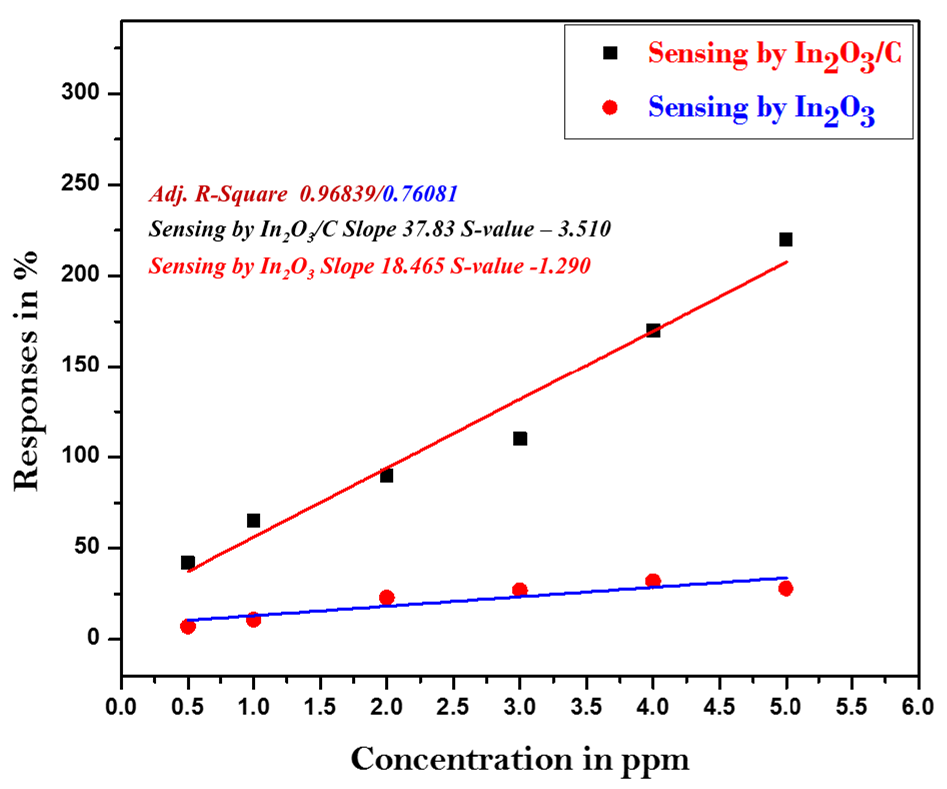


***Fig.9*** Sensing by In2O3 /C and In2O3 at operating temperature 250oC.

1. **Supporting Information Fig. S5:**


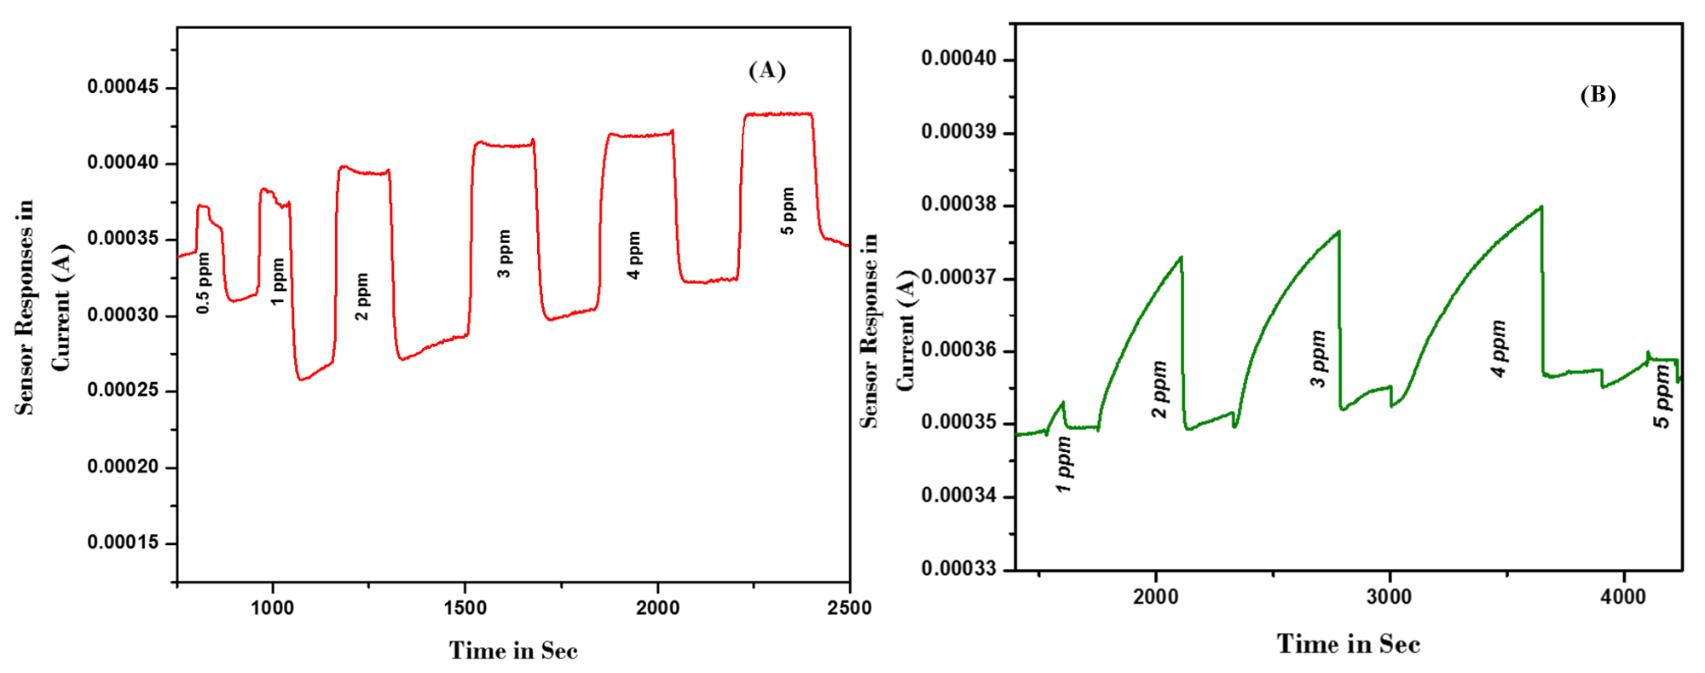
H2S Sensing by In2O3/C at operating temperature range of 275oC and 300oC

***Fig S5***.(A) H2S Sensing of In2O3/C at 275oC (B) H2S Sensing of In2O3/C at 300oC.
